# Supplementary figures and images for: Higher proportions of CD39+ tumor-resident cytotoxic T cells predict recurrence-free survival in patients with stage III melanoma treated with adjuvant immunotherapy
Source: PubMed Central journal article supplement — J Immunother Cancer. 2022 Jun 10;10(6):e004771. doi: 10.1136/jitc-2022-004771 (PMC9189855; doi:10.1136/jitc-2022-004771), 2022-06-10

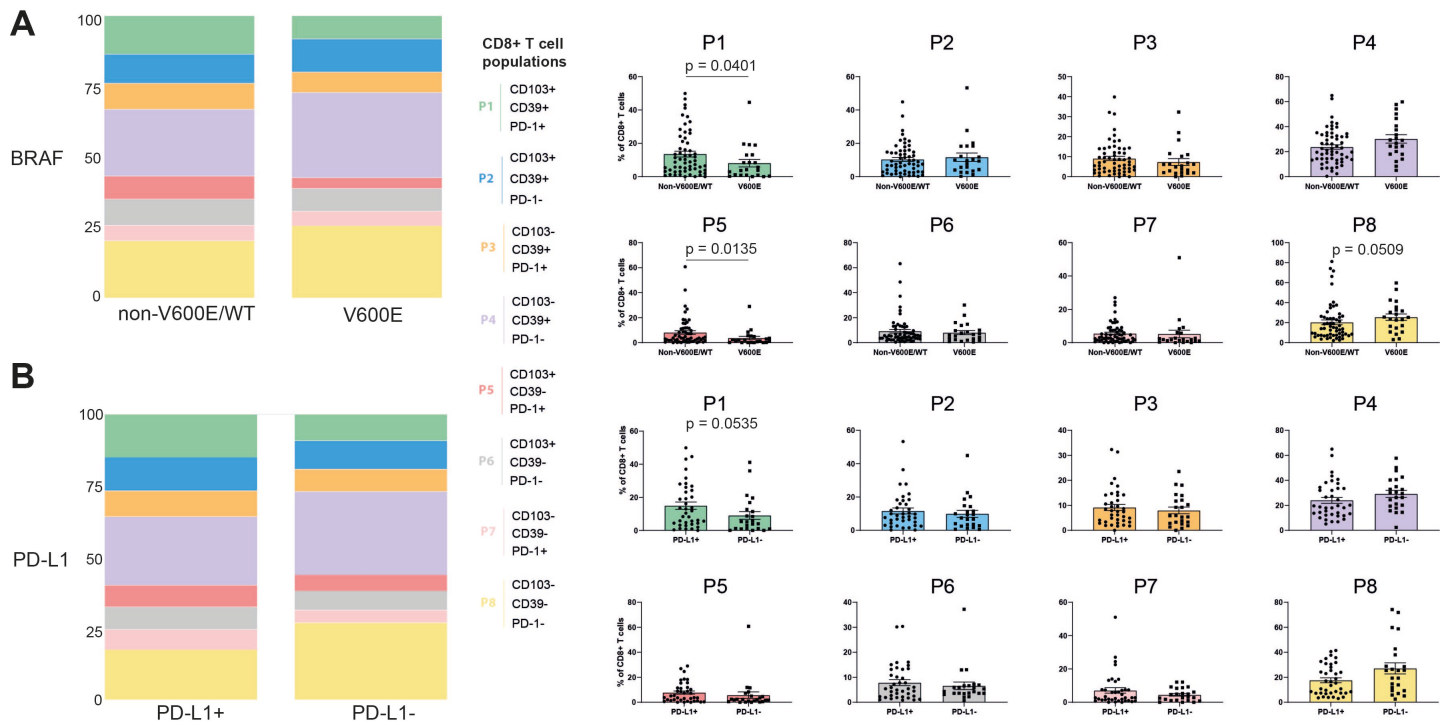

Supplement: jitc-2022-004771supp002.pdf [file jitc-2022-004771supp002.pdf]

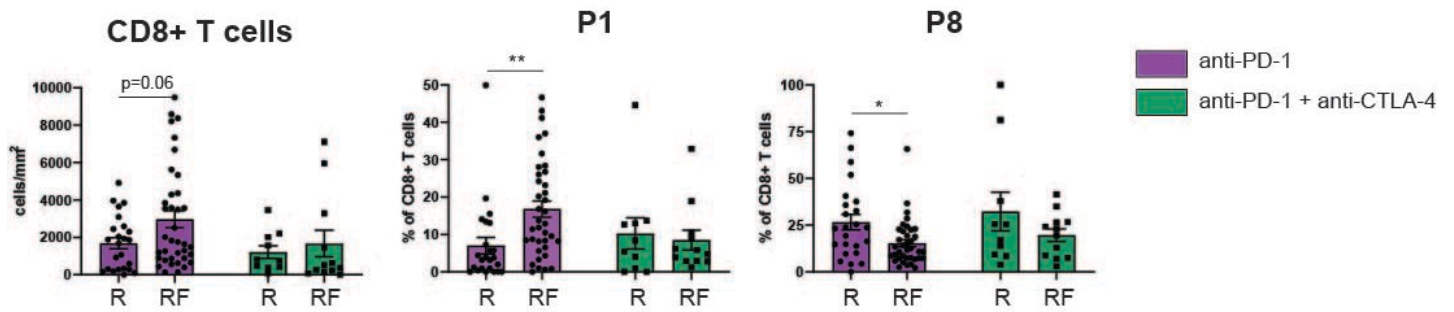

Supplement: jitc-2022-004771supp003.pdf [file jitc-2022-004771supp003.pdf]

## Tumor cell proximity

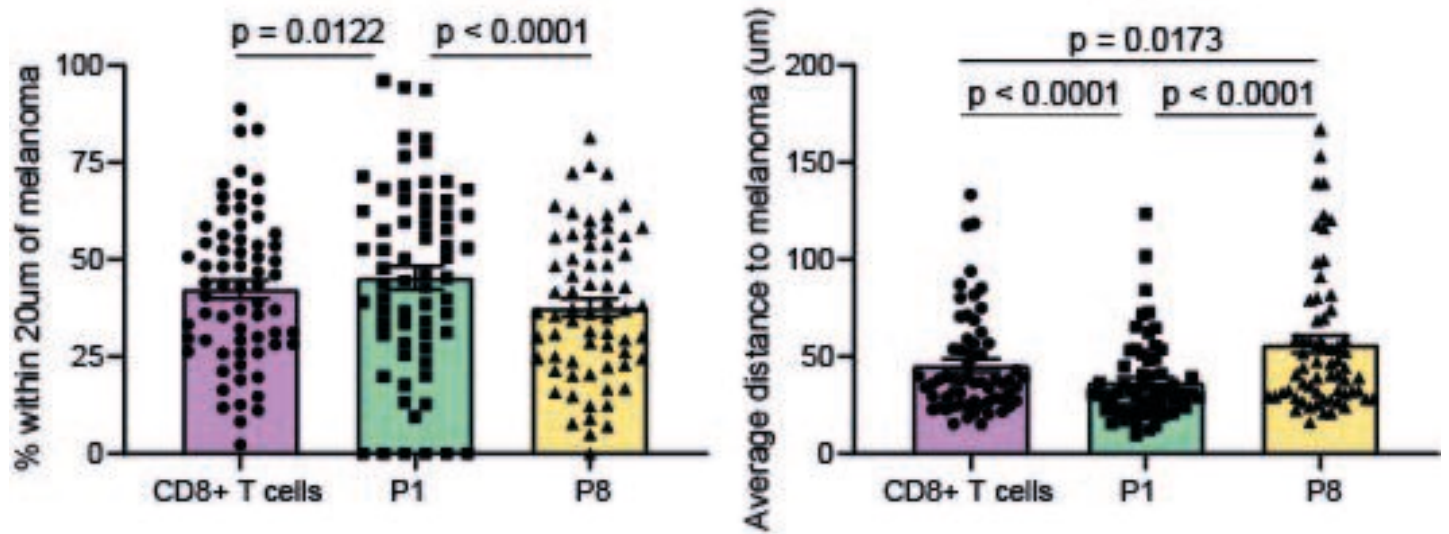

Supplement: jitc-2022-004771supp004.pdf [file jitc-2022-004771supp004.pdf]

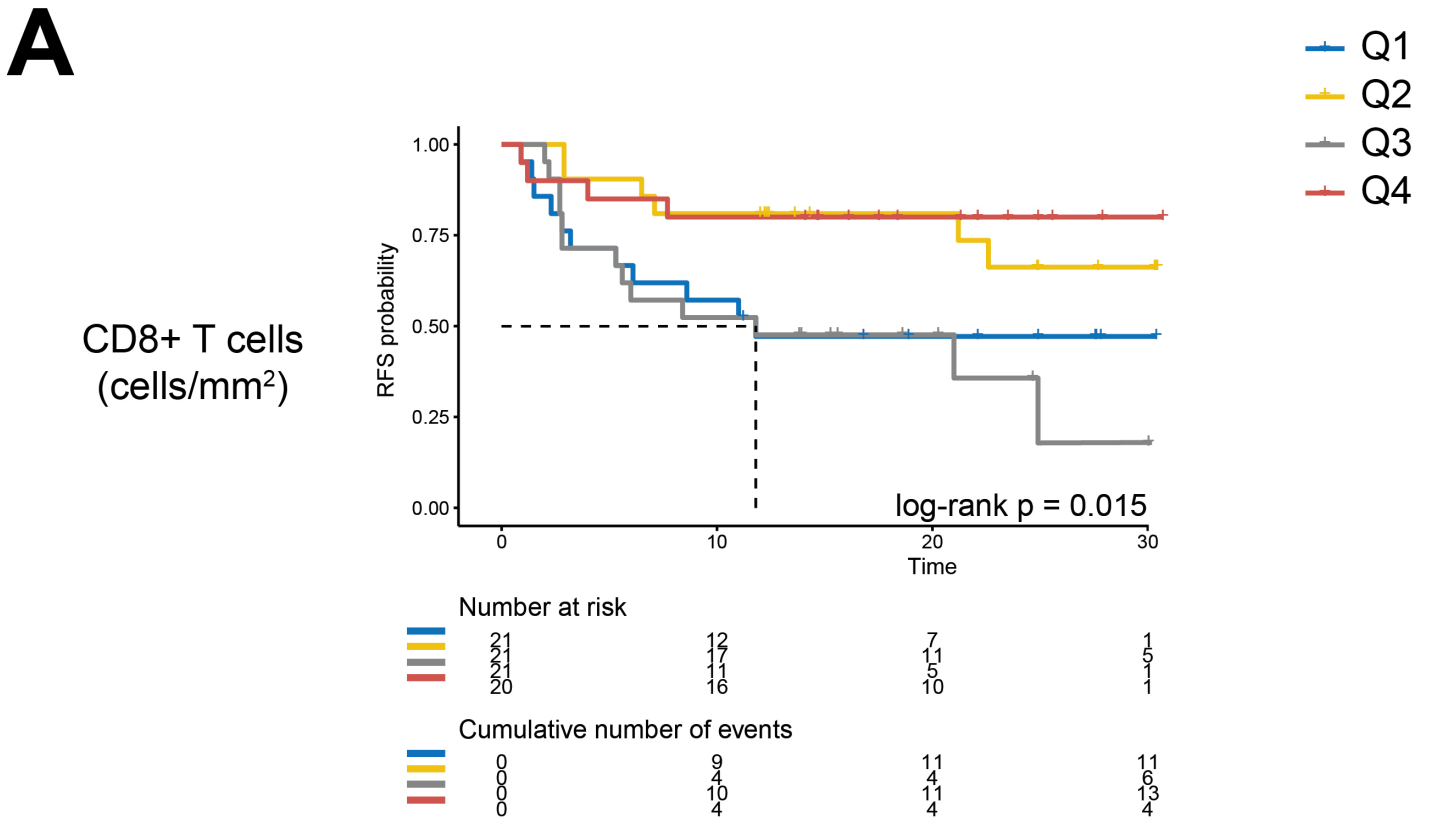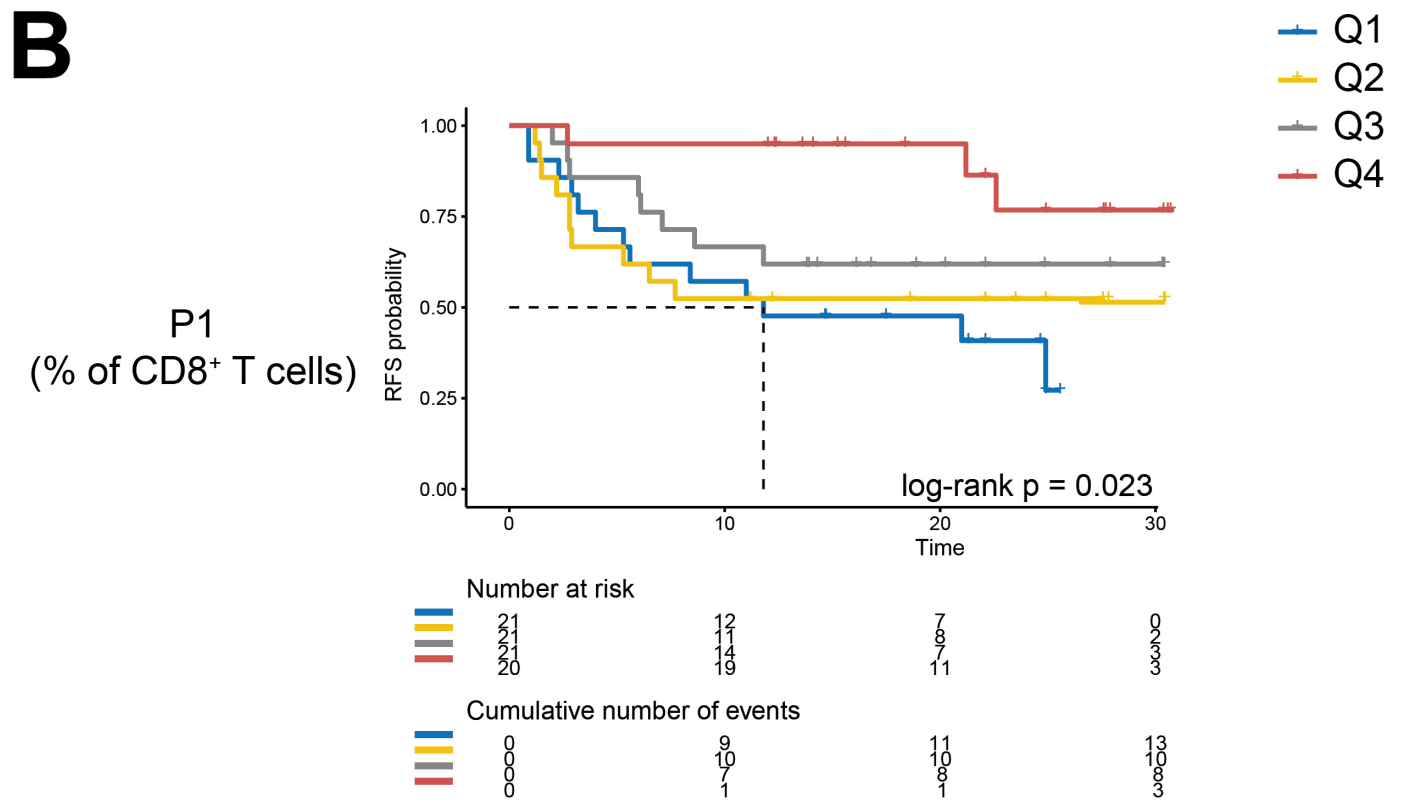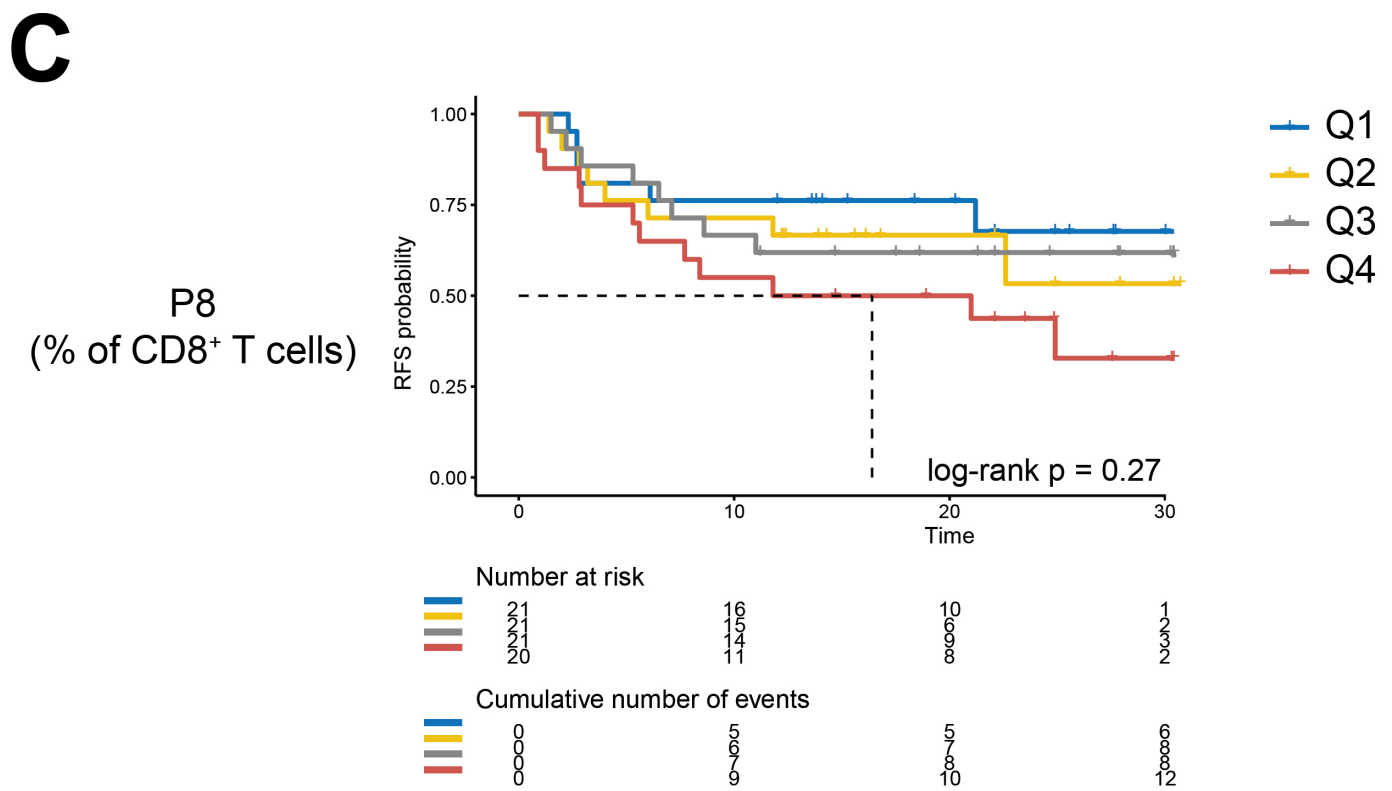

Supplement: jitc-2022-004771supp005.pdf [file jitc-2022-004771supp005.pdf]

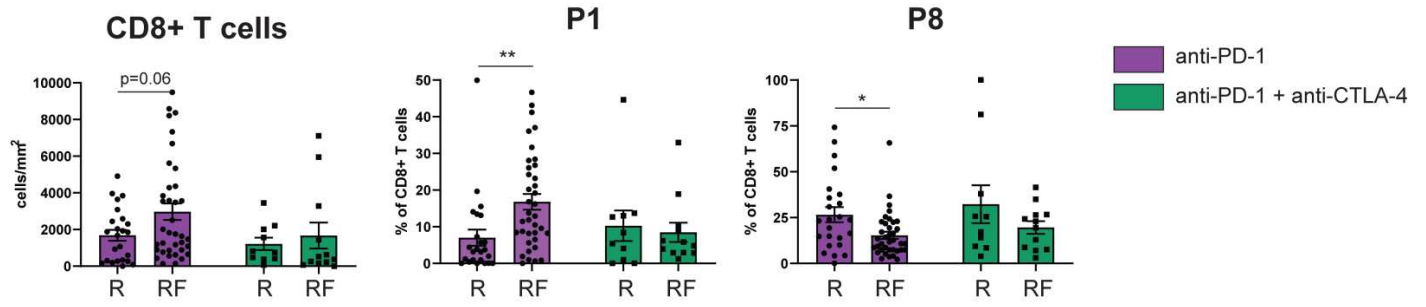

Supplement: jitc-2022-004771supp006.pdf [file jitc-2022-004771supp006.pdf]

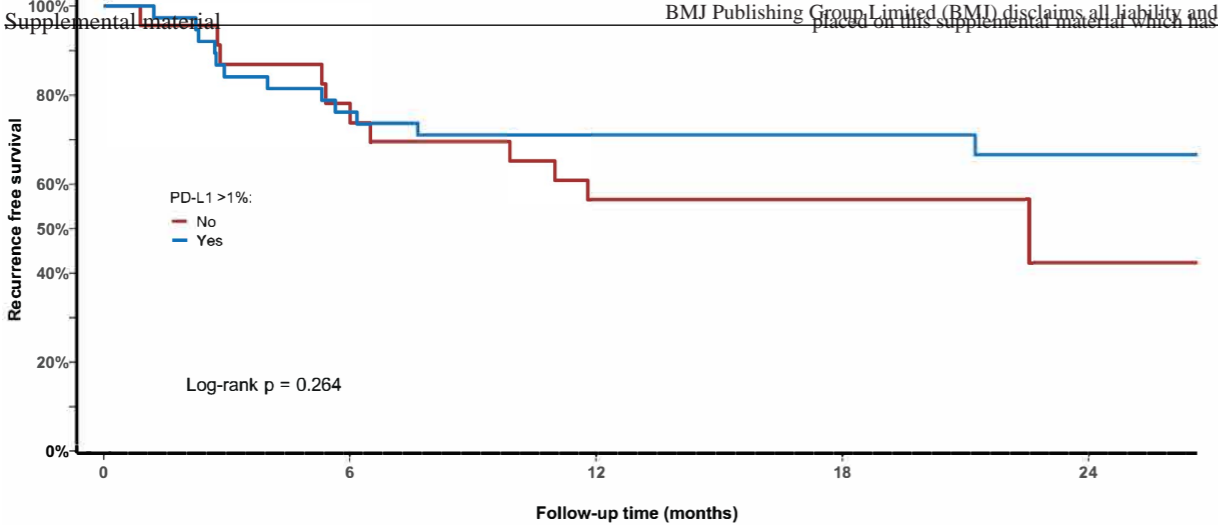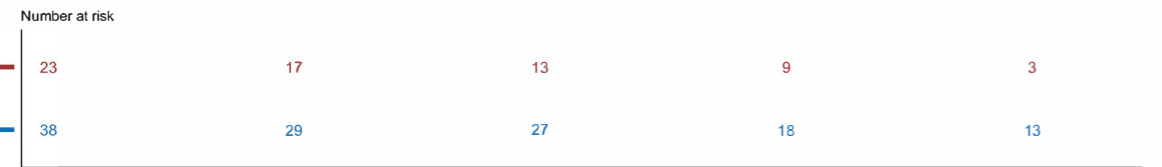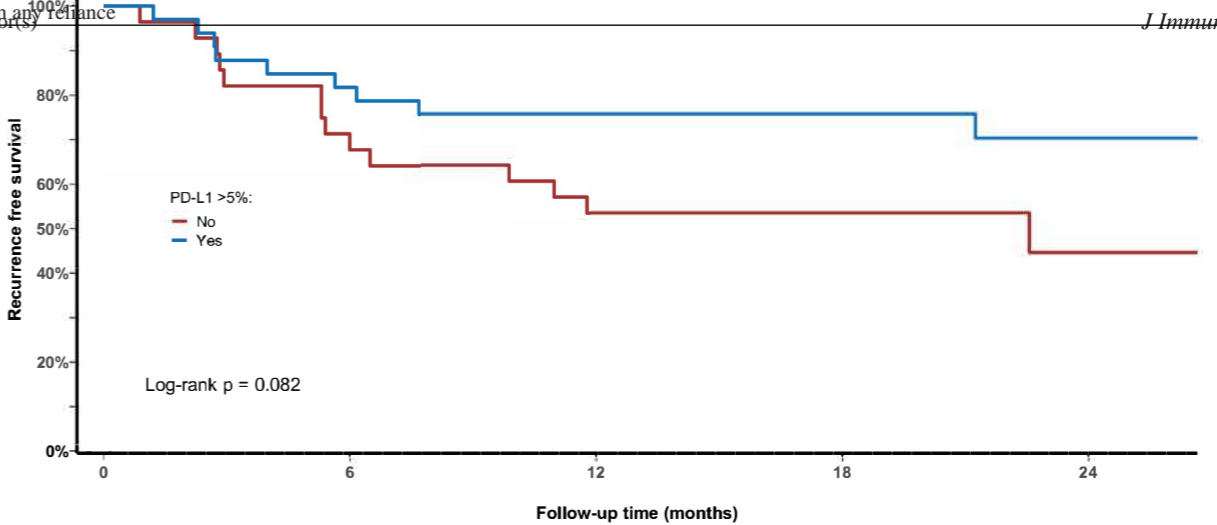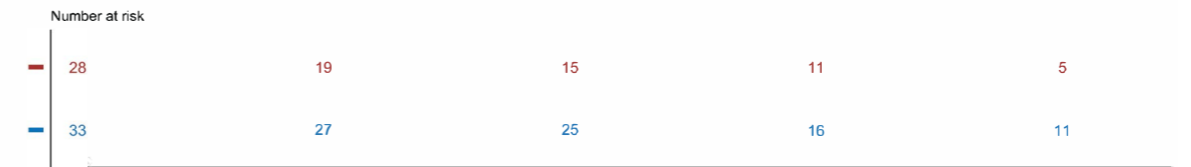

Supplement: jitc-2022-004771supp007.pdf [file jitc-2022-004771supp007.pdf]
